# Supplementary material for: Genome-Resolved Proteomic Stable Isotope Probing of Soil Microbial Communities Using 13CO2 and 13C-Methanol
Source: PubMed Central journal article supplement (PMC6908837; doi:10.3389/fmicb.2019.02706), 2019-12-06
Supplement: Presentation_1.pdf [file Presentation_1.pdf]

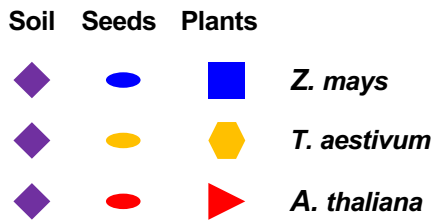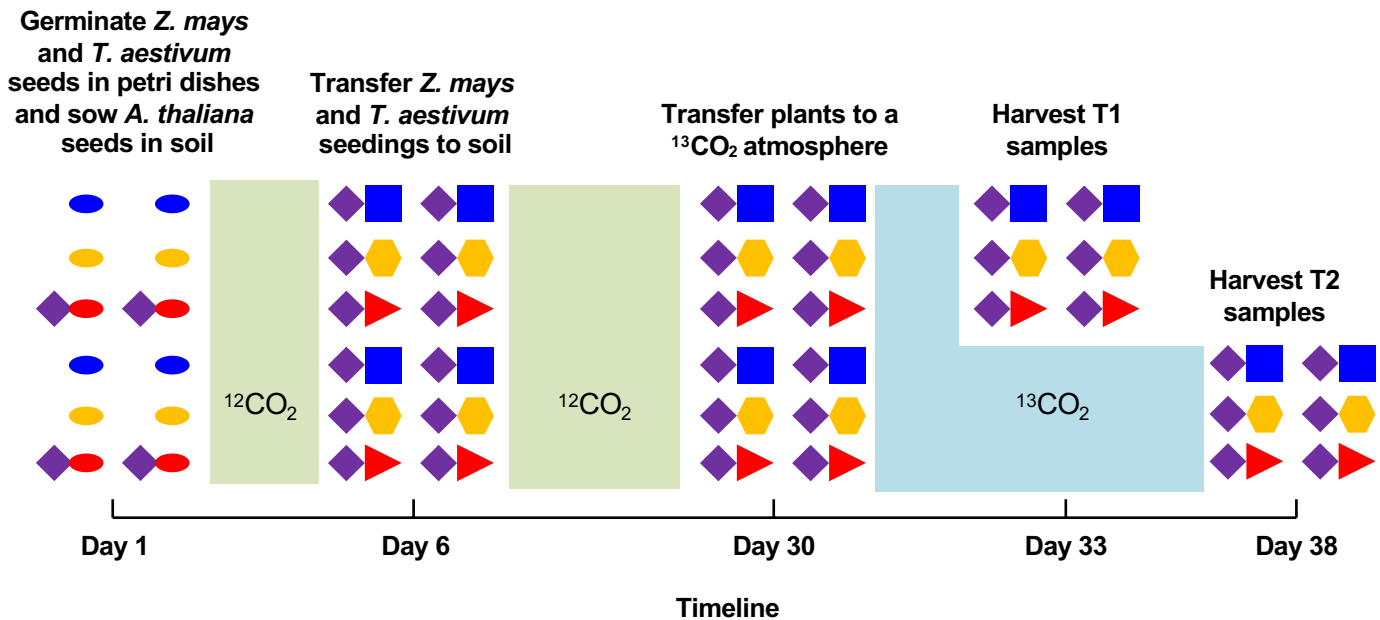

**Supplementary Figure 1: Experimental design of the  $^{13}\text{CO}_2$  rhizosphere proteomic SIP experiment.** *Z. mays*, *T. aestivum*, and *A. thaliana* plants were grown in a normal atmosphere from Day 1 to Day 29. These plants were moved to a  $^{13}\text{CO}_2$  atmosphere on Day 30. Two pots per plant species were harvested on Day 33 as timepoint-1 samples (T1) and on Day 38 as timepoint-2 samples (T2).

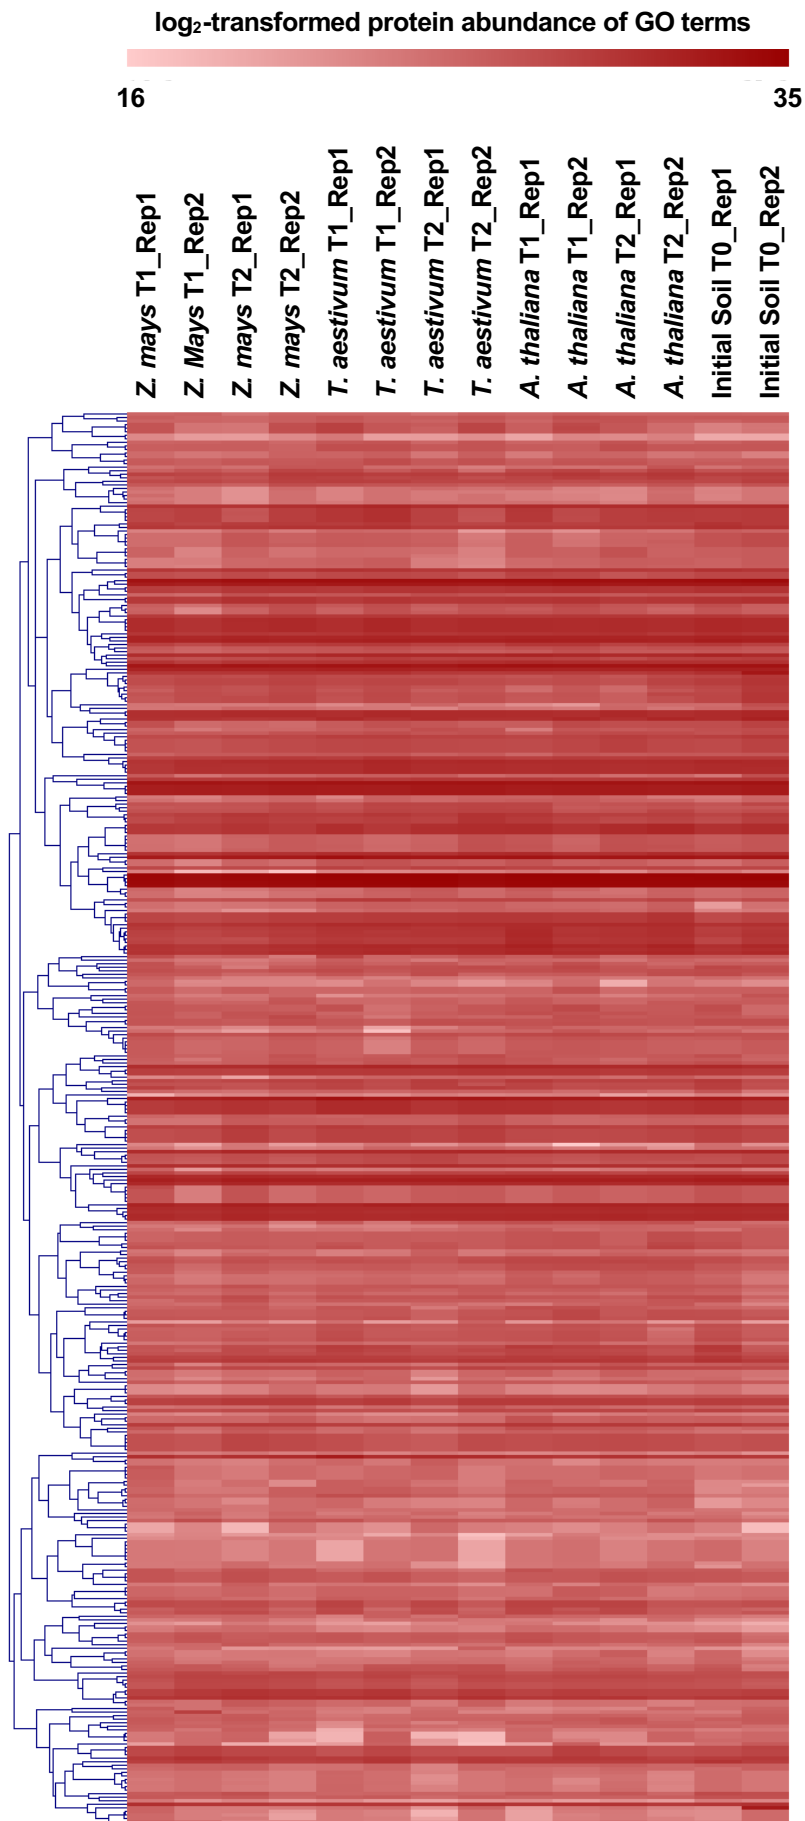

**Supplementary Figure 2: Heatmap of log<sub>2</sub>-transformed protein abundances of GO terms of rhizosphere and initial soil samples.** GO terms identified across all twelve rhizosphere and two initial soil communities were clustered by their unlabeled protein abundances measured by metaproteomics.

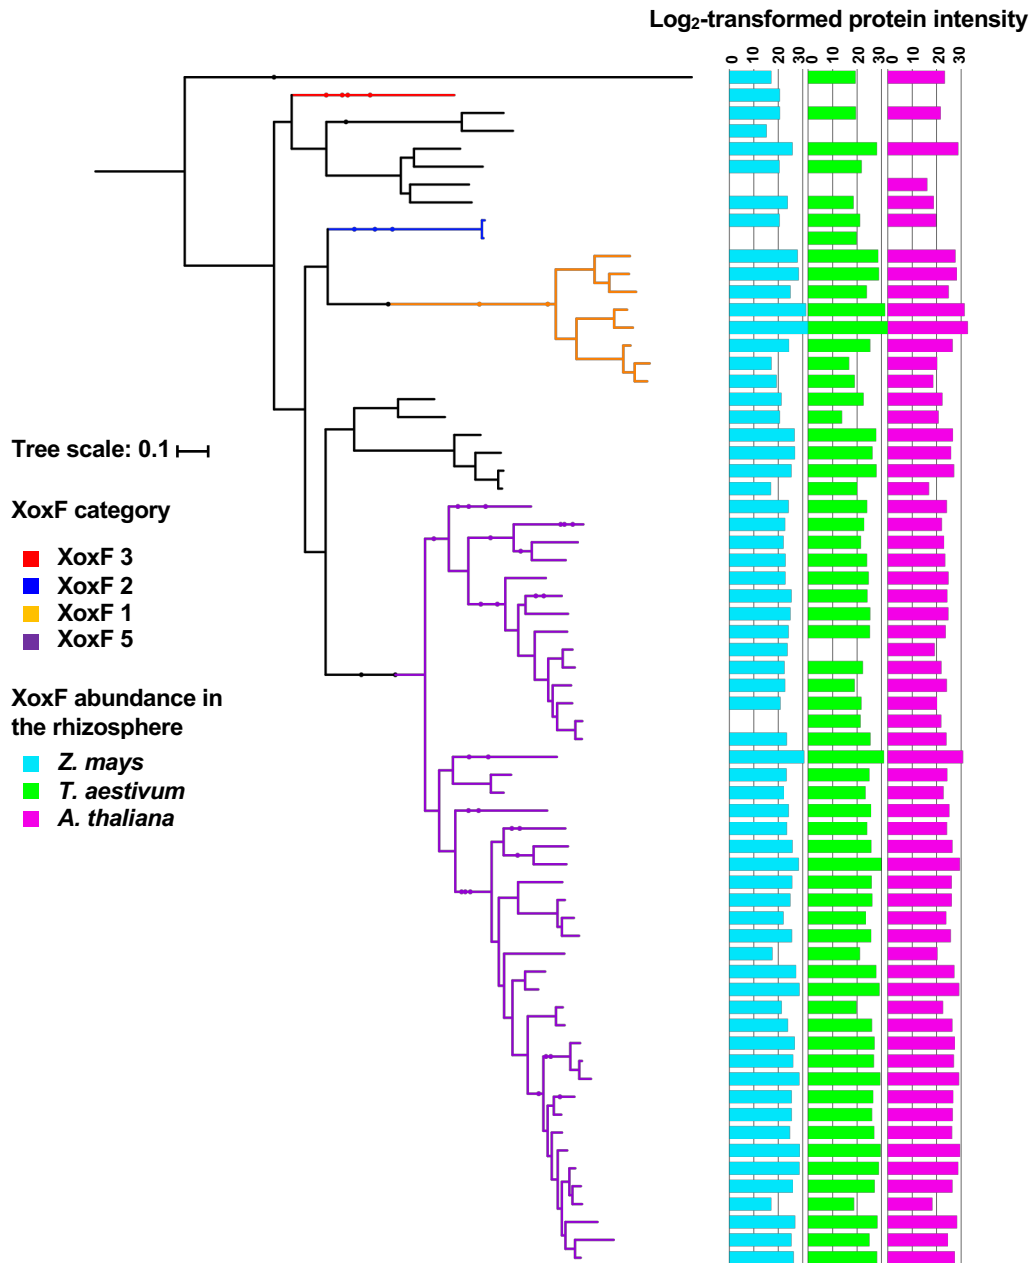

**Supplementary Figure 3A: Phylogenetic tree of 68 XoxF proteins identified by metaproteomics in this study in relation to 146 reference XoxF sequences.** Only branches of the 68 XoxF proteins are shown in the figure and branches of the 146 reference sequences are deleted. See the supplementary figure 3 for the full tree. Each branch is color-coded according to the XoxF category established in Taubert et al. The bar graphs represent the log<sub>2</sub>-transformed XoxF protein abundance in the rhizosphere of each plant species.

Tree scale: 0.1

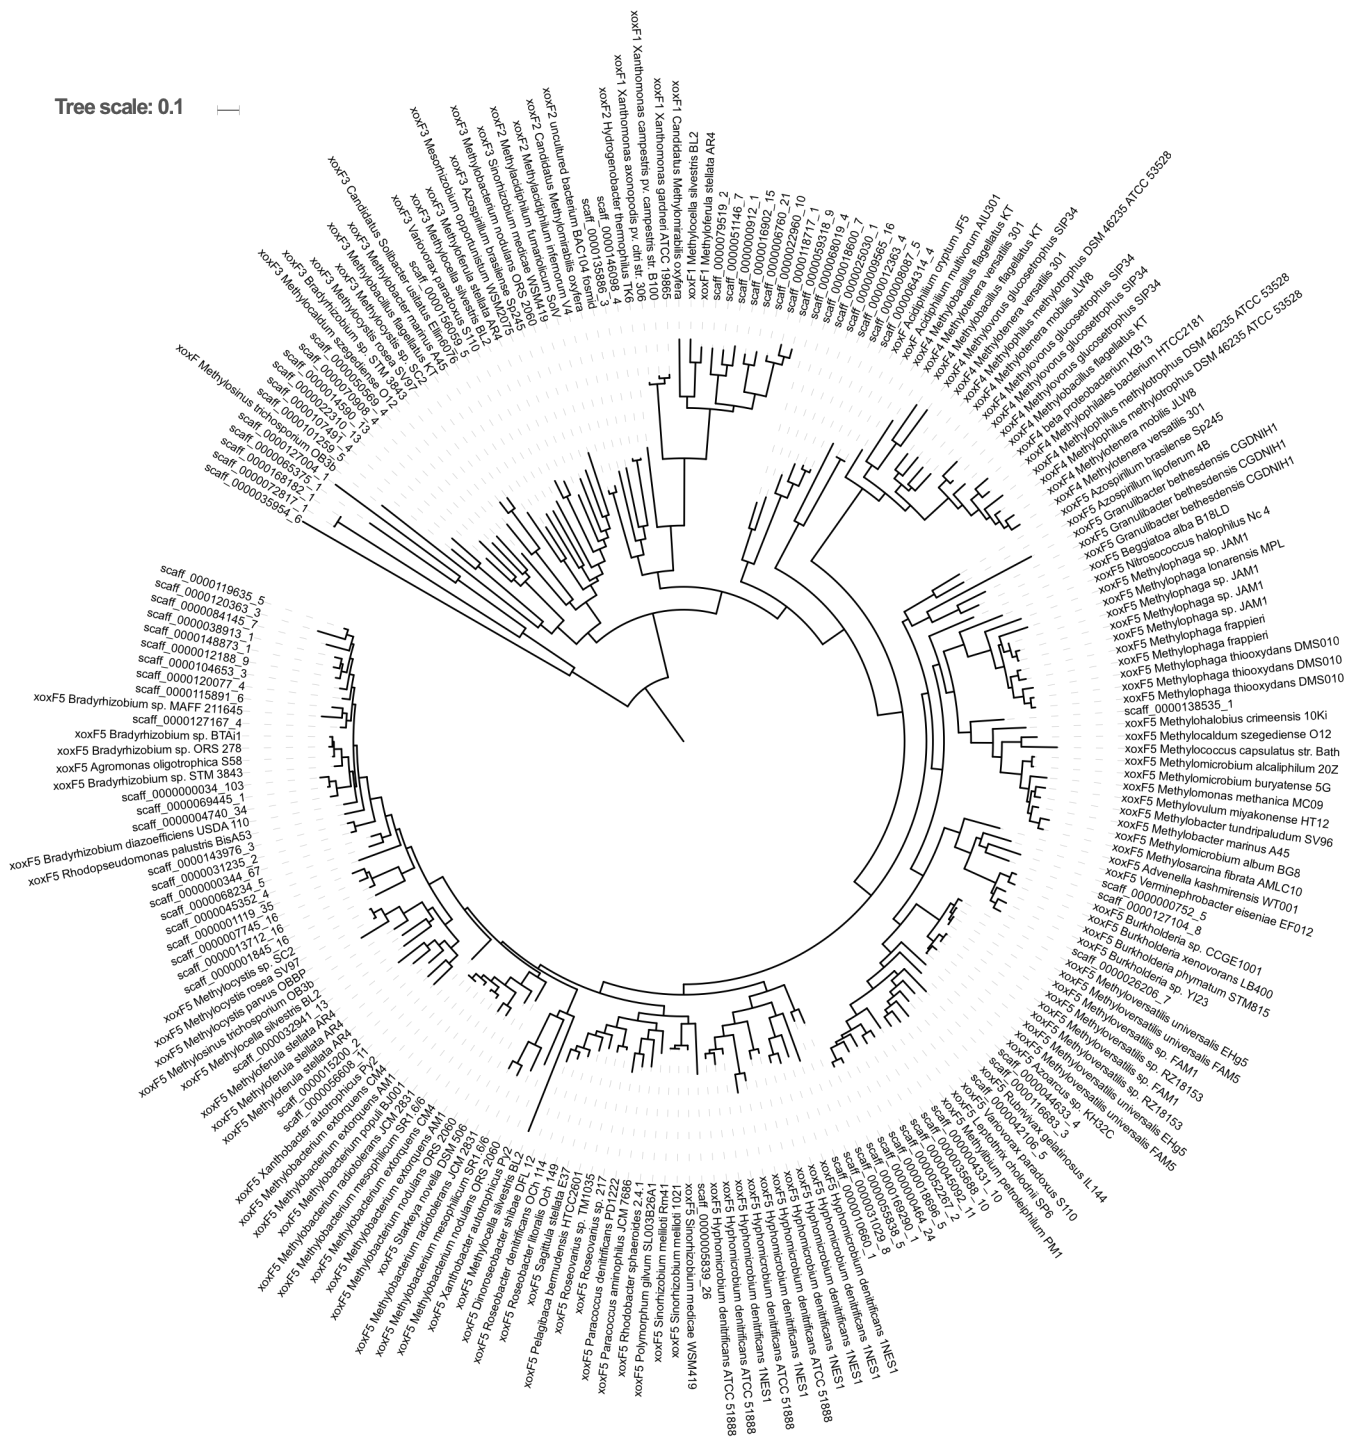

**Supplementary Figure 3B: Full phylogenetic tree of XoxF proteins identified by metaproteomics in this study in relation to 146 reference XoxF sequences from Taubert et al.** Branches of XoxF proteins identified from this study are labeled with Protein ID starting with “scaff”. The rest of the branches belong to reference sequences.

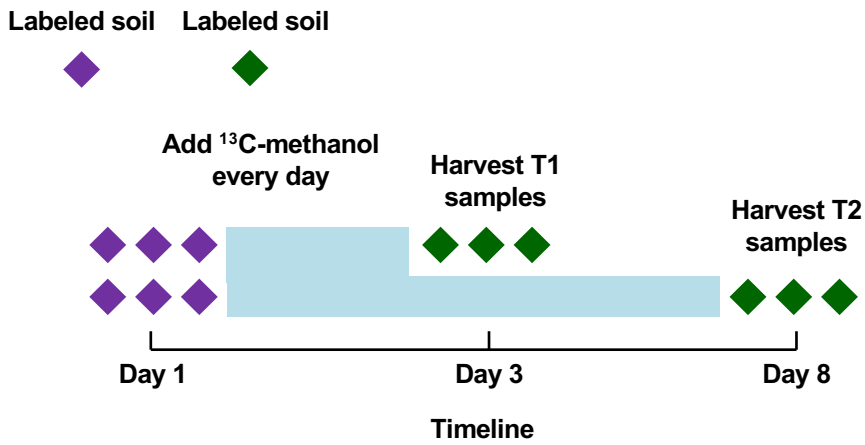

**Supplementary Figure 4: Experiment design of the <sup>13</sup>C-methanol proteomic SIP experiment.** <sup>13</sup>C-methanol was added into six replicates of soil microcosms every day during the labeling. Triplicate microcosms were harvested after 3 days (T1) of incubation and after 8 days (T2) of incubation.
